# Supplementary material for: Dnd knockout ablates germ cells and demonstrates germ cell independent sex differentiation in Atlantic salmon
Source: PubMed Central journal article supplement (PMC4758030; doi:10.1038/srep21284), 2016-02-18
Supplement: srep21284-s1.pdf [file srep21284-s1.pdf]

## Supplementary information for the article;

### ***Dnd knockout ablates germ cells and demonstrates germ cell independent sex differentiation in Atlantic salmon***

Anna Wargelius<sup>1\*</sup>, Sven Leininger<sup>1, 2</sup>, Kai Ove Skaftnesmo<sup>1</sup>, Lene Kleppe<sup>1</sup>, Eva Andersson<sup>1</sup>, Geir Lasse Taranger<sup>1</sup>, Rüdiger W Schulz<sup>1,3</sup>, Rolf B Edvardsen<sup>1</sup>

<sup>1</sup>Institute of Marine Research, P.O. Box 1870, Nordnes, NO-5817 Bergen, Norway

<sup>2</sup>present address: MSD Animal Health Innovation AS, Thormøhlensgate 55, 5008 Bergen, Norway

<sup>3</sup>Utrecht University, Science Faculty, Department Biology, Padualaan 8, NL-3584 CH Utrecht, The Netherlands.

Contact

\*Corresponding author, [anna.wargelius@imr.no](mailto:anna.wargelius@imr.no)

## Supplementary material

**Supplementary Figure S1.** Representative analysis of CRISPR-Cas9-mediated knock out of *dnd* and *alb*: chromatograms showing sequencing results of amplicons of *dnd* and *alb* around the CRISPR site (light green arrows). A: fish with no mutations; B: a male and C: a female fish with mutations indicated by multiple peaks starting in the CRISPR site and proceeding downstream.

**Supplementary Figure S2.** Gross morphology and histology of six fish (n=3 of each sex) showing the germ cell free phenotype. Numbers on fish refer to the fish presented in Supplementary table S2, where more information on each fish is found (length, weight, age, sampling date and phenotype of sectioned gonad). (a) Picture of fish, (b) gross morphology of gonads and (c) section of respective gonad. Scale bar in 7c, 8c, 10c, 20c, 18c and 28c, 100  $\mu$ M.

**Supplementary Figure S3.** Gross morphology and histology of one control fish and 2 mosaic *dnd*KO fish, numbers on *dnd* KO fish refers to the fish presented in Supplementary table S2, (listing length, weight, age, sampling date and phenotype of sectioned gonad). (a) picture of fish, (b) gross morphology of gonads and (c) section of respective gonad. Scale bar in control histology, 25c and 27c, 100  $\mu$ M.

**Supplementary Figure S4.** Relative gene expression of *vasa* (a), *cyp19a1a* (b) and *amh* (c) in adult Atlantic salmon tissues (n=3 per tissue; ovary, testis, liver, brain, head kidney, intestine, muscle and spleen). Samples assayed are listed on the x-axis, while the y-axis indicates the relative abundance of the transcripts in relation to the normalization factor *elongation factor1 $\alpha$* . For each gene all values were calibrated to the sample with the lowest  $\Delta$ Ct; therefore the highest gene expression value was set to 1. All data are shown as SEM. n=3.

**Supplementary Figure S5.** Relative gene expression of *dnd* (a), *foxl2* (b) and *sox9a* (c) in adult Atlantic salmon tissues in gonads of male and female *dnd* KO (n=4 per sex) and control fish (n=3 per sex). Gonads were obtained from 12-18 months old fish. Individual fish used for qPCR are indicated in Supplementary table S2. Samples assayed are listed on the x-axis, while the y-axis indicates the relative abundance of the transcripts in relation to the normalization factor *elongation factor1 $\alpha$* . Data are presented as  $\pm$ SEM. Significant gene expression differences between groups are indicated by letters (a, b and c); *n.d.* - not detected.

**Supplementary table S1.** Oligonucleotides and primers used in the study

**Supplementary table S2.** Overview of all fish sampled and used in the analysis of mutated and control fish. The table shows fish number (No), sample type (Sample), sex (F/M), phenotype of gonad, if sample was included in qPCR analysis, sampling date and length, weight and age (months) of fish.

# Supplementary Figure S1

**A** control fish

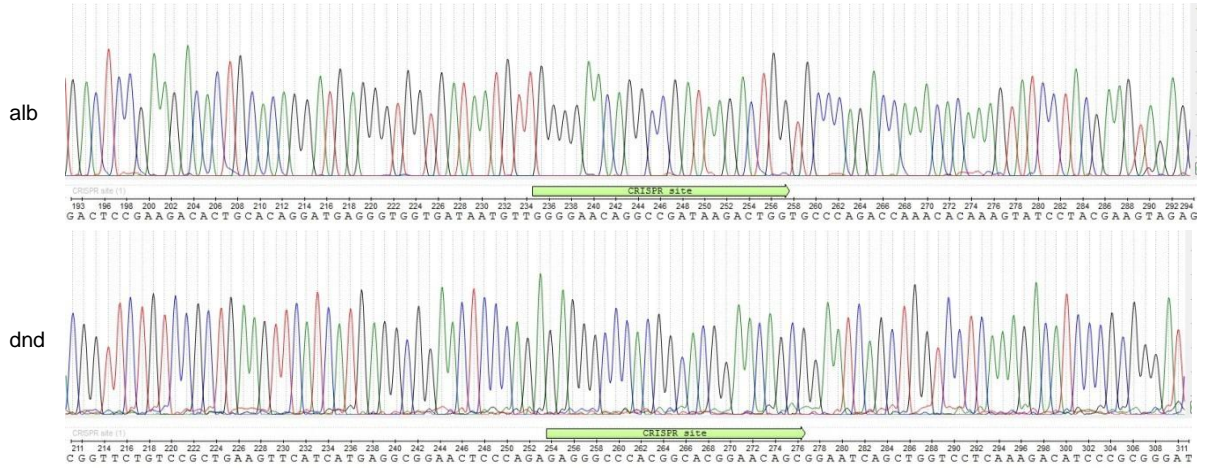

**B** *dnd/alb* KO fish, male

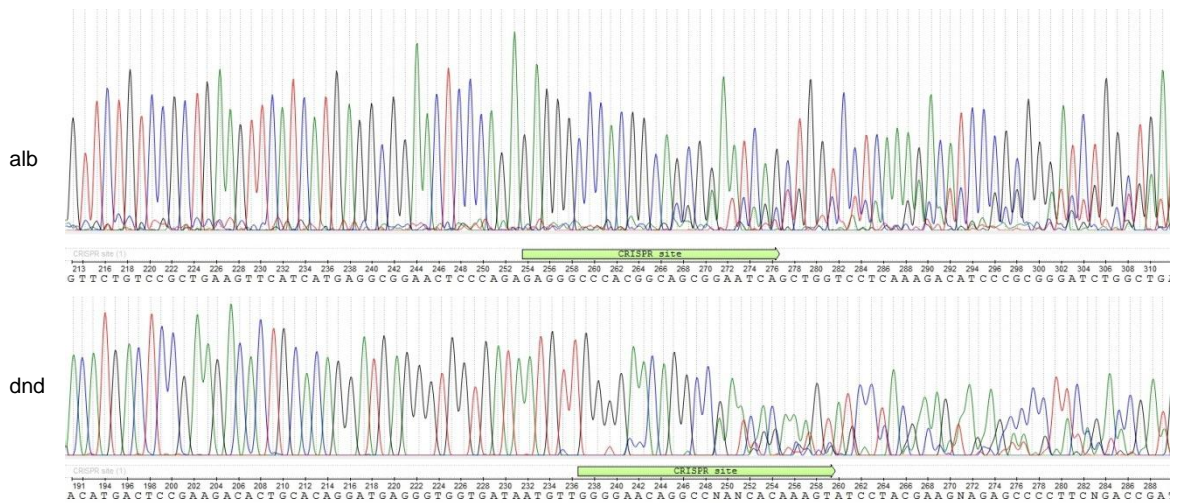

**C** *dnd/alb* KO fish, female

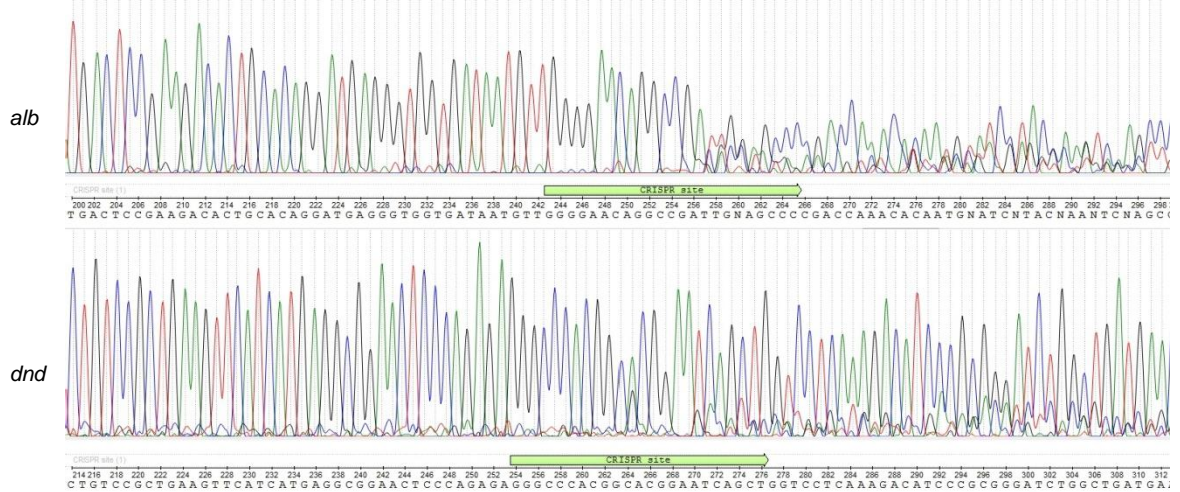

Supplementary Figure S2

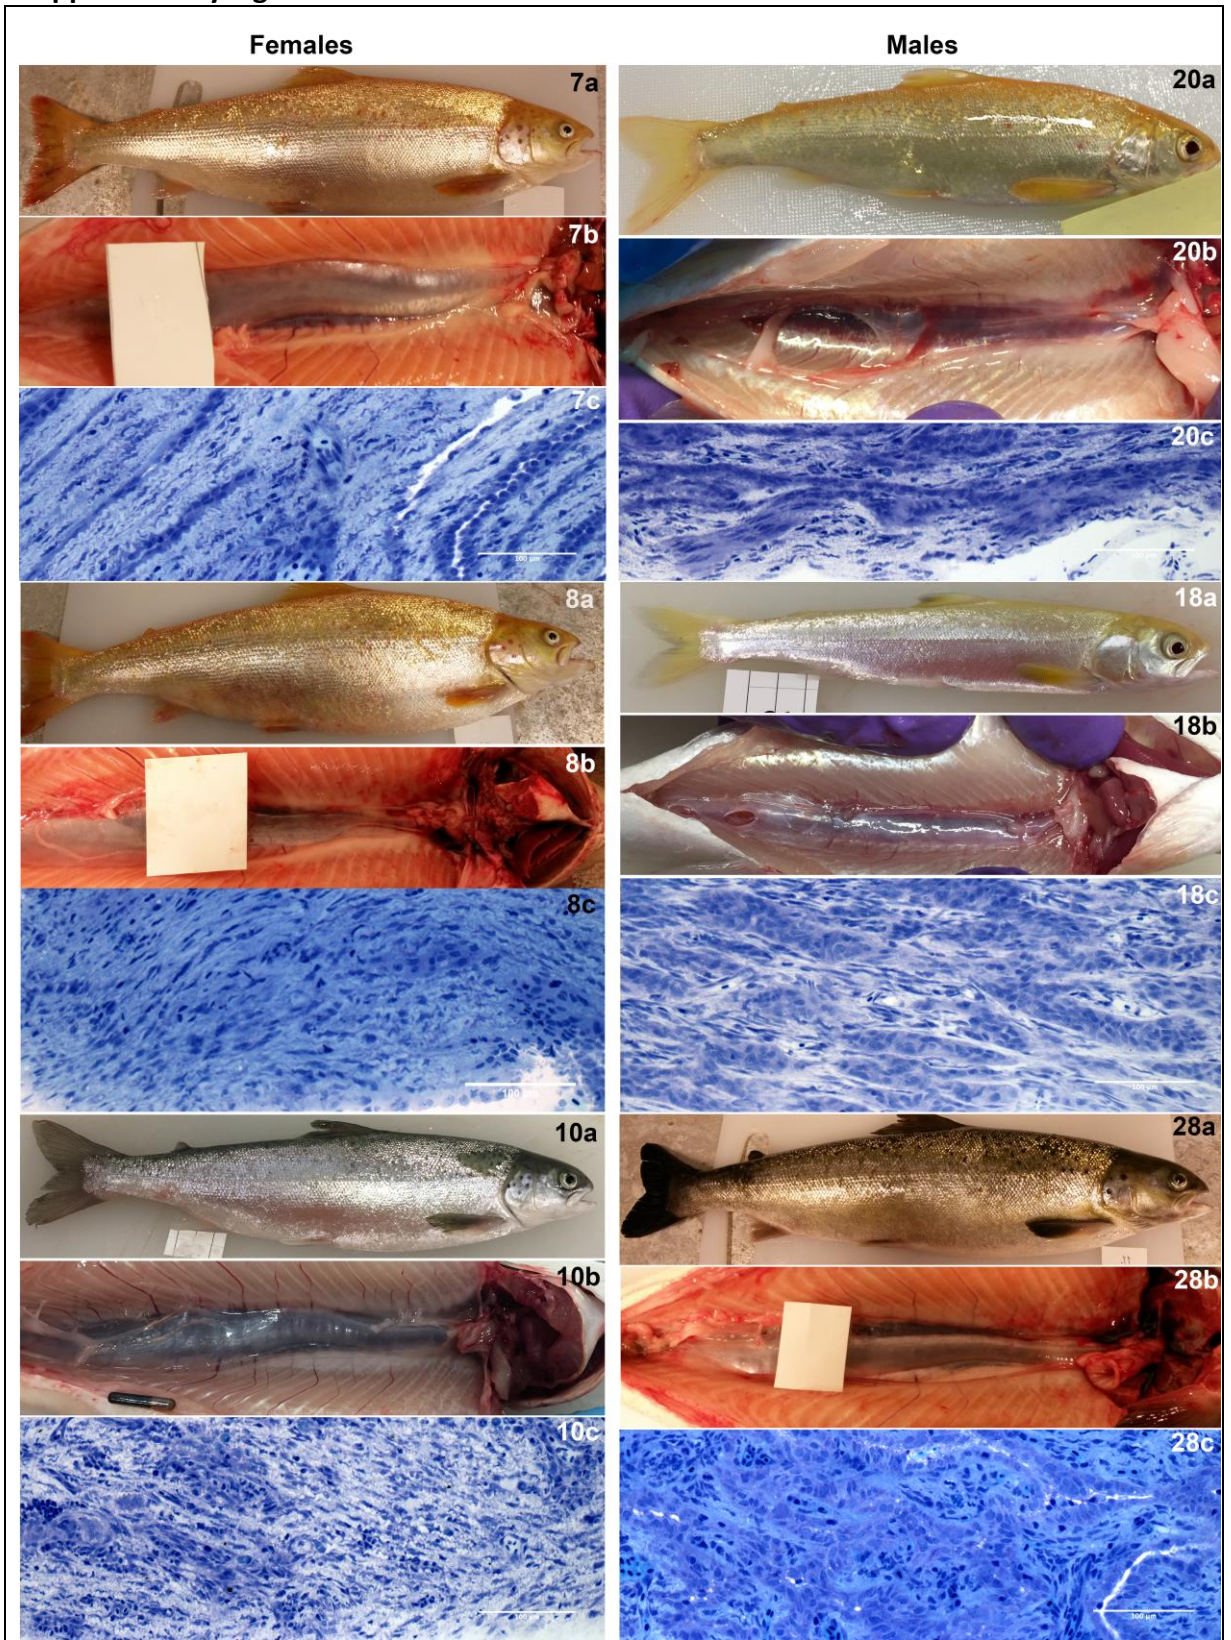

Supplementary Figure S3

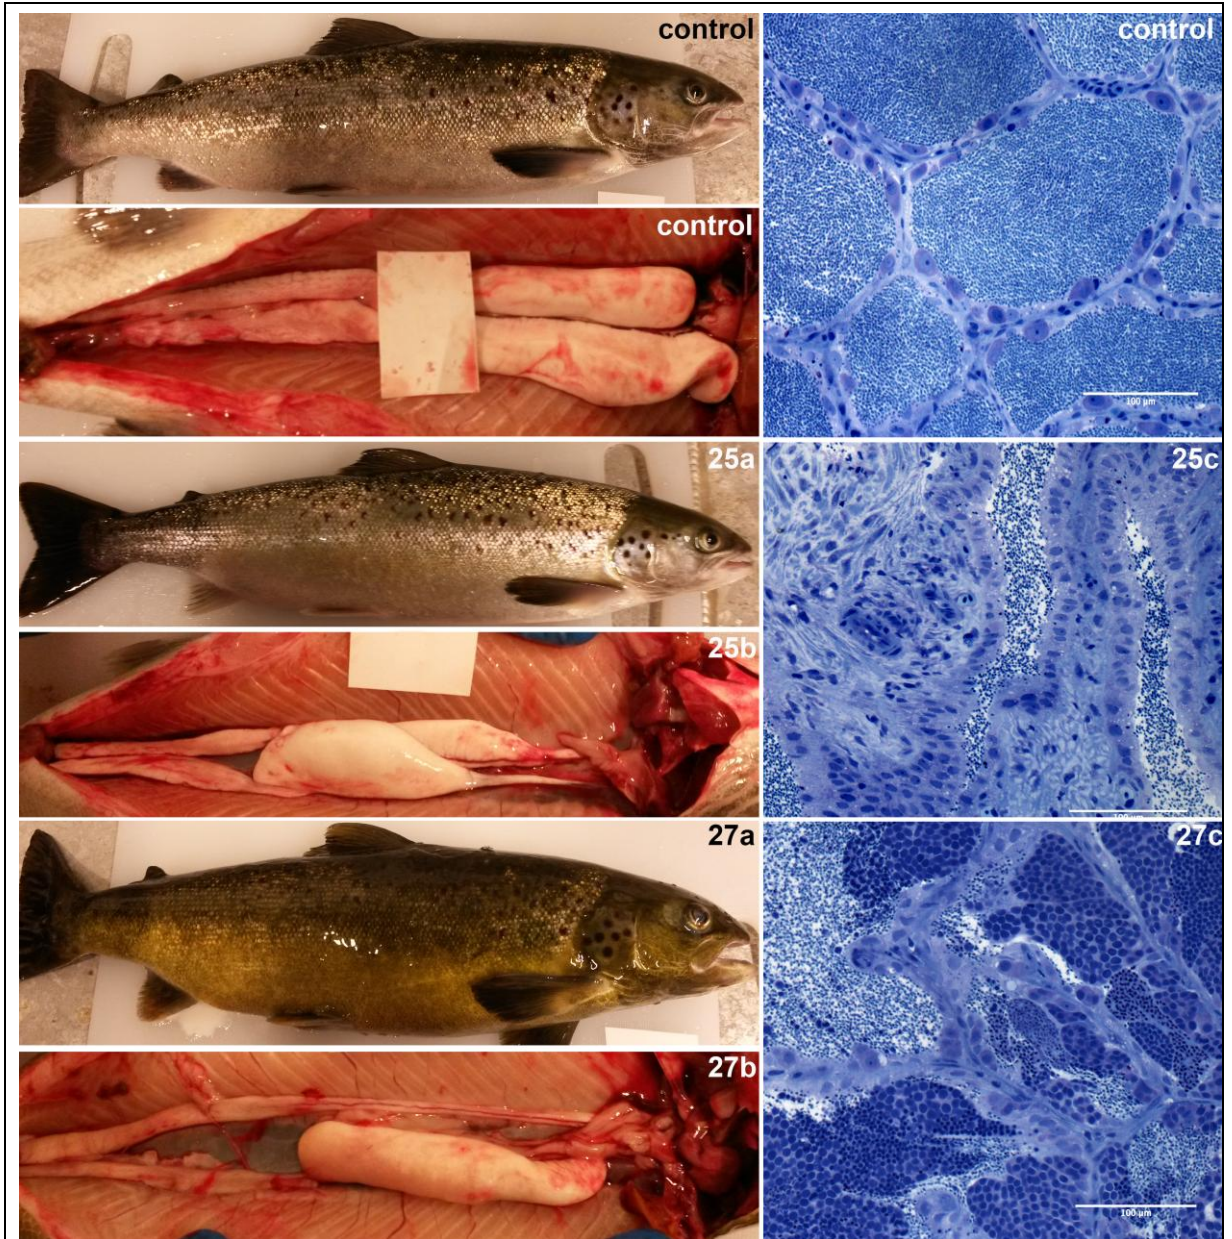

Supplementary Figure S4

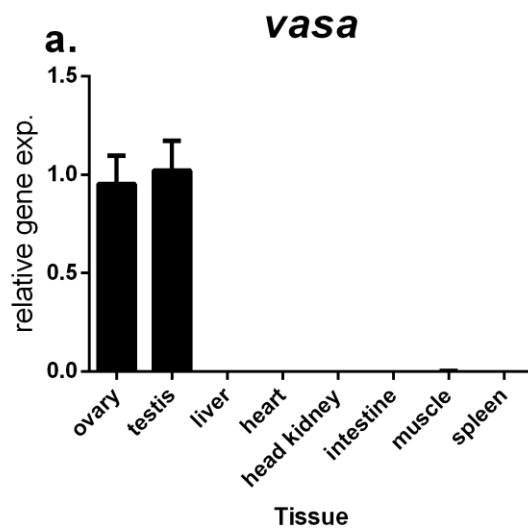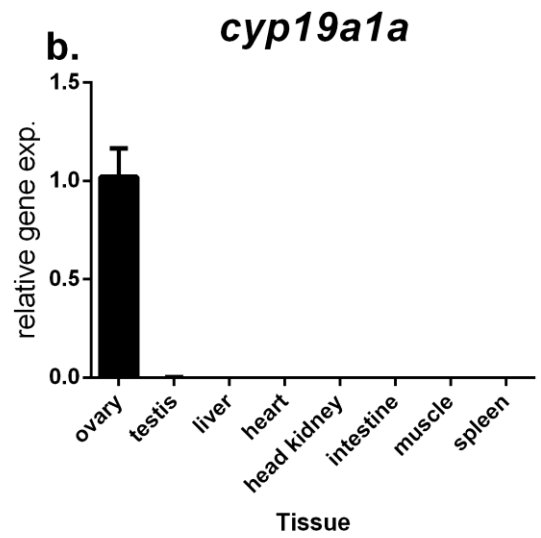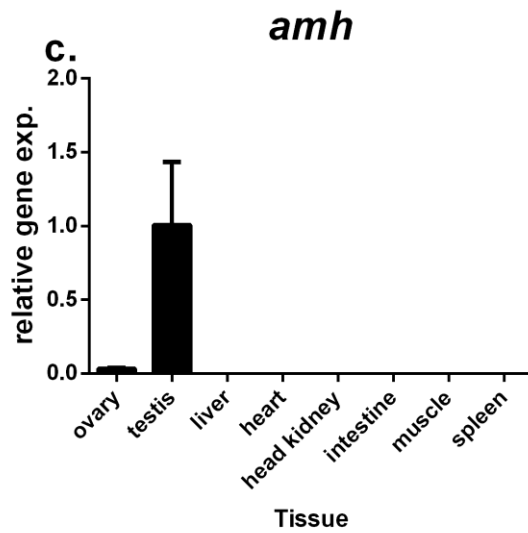

Supplementary Figure S5

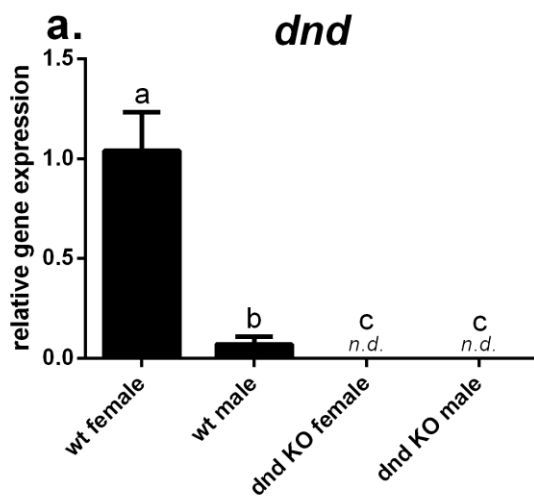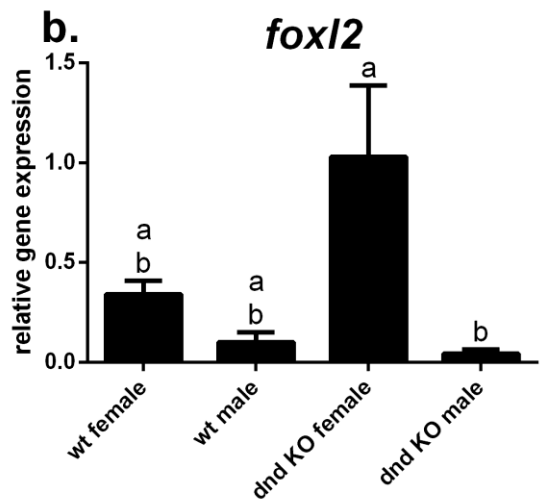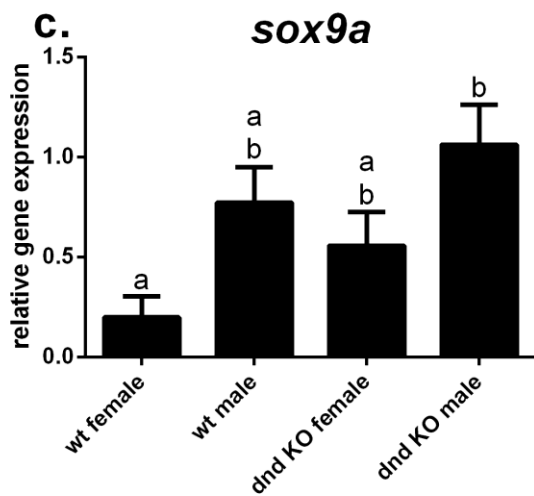



**Supplementary table S1. Oligonucleotides and primers****CRISPR target site oligonucleotides**

| Oligo name        | Oligo                         |
|-------------------|-------------------------------|
| <i>dnd target</i> | 5'-GGGCCCACGGCACGGAACAGCGG-3' |
| <i>dnd 1F</i>     | 5'-TAGGGCCCACGGCACGGAACAG-3'  |
| <i>dnd 1R</i>     | 5'-AAACCTGTTCCGTGCCGTGGGC-3'  |

**PCR primers used in mutation screens for *dnd***

| Primer name     | Primer sequence              |
|-----------------|------------------------------|
| <i>dnd</i> PCRF | 5'-TACATGCATCATTCCCACCCC-3'  |
| <i>dnd</i> PCRR | 5'-AAGTTCCACCATTACACTGCTT-3' |

**Primers and probes used for qPCR**

| Primer/ probe name    | Primer sequence                     |
|-----------------------|-------------------------------------|
| <i>vasa</i> F         | 5'-GAGGTCCTCAAGACTACAACCTTGTGT-3'   |
| <i>vasa</i> R         | 5'-GCACATTGCAGCCCTTCAGT-3'          |
| <i>vasa</i> probe     | Fam-AGCACCGGTCACACCATTTCGTGAG-TAMRA |
| <i>cyp19a1a</i> F     | 5'-TCAAACAGAACCCTGACGTAG-3'         |
| <i>cyp19a1a</i> R     | 5'-GCTCCCTTTCACCTATAGCAGTGT-3'      |
| <i>cyp19a1a</i> probe | Fam-ACAGCTCCTAGAAGAGAT-MGB          |
| <i>amh</i> F          | 5'-CAGTCACTCTCTGCAGCCTTACAA-3'      |
| <i>amh</i> R          | 5'-CAACATTGAATCTCCATTTCAGTTTAC-3'   |
| <i>amh</i> probe      | Fam-TTTGCCCTCGGGTTGCTTTCCTGTT-TAMRA |
| <i>ef1a</i> F         | 5'-CCCCTCCAGGACGTTTACAAA-3'         |
| <i>ef1a</i> R         | 5'-CAGACGGCCCACAGGTACA-3'           |
| <i>ef1a</i> probe     | Fam-ATCGGTGGTATTGGAAC-MGB           |
| <i>dnd</i> F          | 5'-TCTGTACAGGGCCTGATGGT-3'          |
| <i>dnd</i> R          | 5'-TAAAACAAAGTAGGGGATCTGTG-3'       |
| <i>foxl2</i> F        | 5'-TACTGGGATCACGAGAGCAAAC-3'        |
| <i>foxl2</i> R        | 5'-ACAAGTGGCCCTCTGGTAAAC-3'         |
| <i>sox9a</i> F        | 5'-TGCAGAACTCAGCAAAACCC-3'          |
| <i>sox9a</i> R        | 5'-TTTCTCCTTCTGGGCTGGTAC-3'         |

**Supplementary table S2.** Overview of all fish sampled and used in the analysis of data.

| No              | Sample            | sex <sup>1</sup> | Phenotype                                       | qPCR | Sampling date | Length | Weight | Age (months) |
|-----------------|-------------------|------------------|-------------------------------------------------|------|---------------|--------|--------|--------------|
| 1 <sup>2</sup>  | Control           | F                | Normal immature female                          | Yes  | 20/1-2015     | 25,8   | 186    | 15           |
| 2               | Control           | F                | Normal immature female                          | Yes  | 20/1-2015     | 29,9   | 309    | 15           |
| 3               | Control           | F                | Normal immature female                          | Yes  | 20/1-2015     | 28,1   | 246    | 15           |
| 4 <sup>2</sup>  | <i>dnd/alb</i> KO | F                | Female lacking ovarian bulbs.                   | No   | 20/1-2015     | 16     | 49     | 12           |
| 5               | <i>dnd/alb</i> KO | F                | Female lacking ovarian bulbs.                   | Yes  | 20/1-2015     | 18,9   | 62     | 12           |
| 6               | <i>dnd/alb</i> KO | F                | Female lacking ovarian bulbs.                   | No   | 12/8-2015     | 43     | 1063   | 18           |
| 7 <sup>3</sup>  | <i>dnd/alb</i> KO | F                | Female lacking ovarian bulbs.                   | No   | 12/8-2015     | 42,5   | 1022   | 18           |
| 8 <sup>3</sup>  | <i>dnd/alb</i> KO | F                | Female lacking ovarian bulbs.                   | No   | 12/8-2015     | 42     | 1051   | 18           |
| 9               | <i>dnd/alb</i> KO | F                | Female lacking ovarian bulbs.                   | No   | 12/8-2015     | 42,5   | 1072   | 18           |
| 10 <sup>3</sup> | <i>dnd</i> KO     | F                | Female lacking ovarian bulbs.                   | Yes  | 20/1-2015     | 28,3   | 255    | 15           |
| 11              | <i>dnd</i> KO     | F                | Female lacking ovarian bulbs.                   | Yes  | 20/1-2015     | 27     | 248    | 15           |
| 12              | <i>dnd</i> KO     | F                | Female lacking ovarian bulbs.                   | Yes  | 20/1-2015     | 24     | 153    | 15           |
| 13              | <i>dnd</i> KO     | F                | Normal immature female                          | No   | 20/1-2015     | 27     | 229    | 15           |
| 14              | Control           | M                | Immature male                                   | Yes  | 12/3-2015     | 26,5   | 208    | 17           |
| 15 <sup>2</sup> | Control           | M                | Immature male                                   | Yes  | 12/3-2015     | 20,5   | 95     | 17           |
| 16              | Control           | M                | Immature male                                   | Yes  | 12/3-2015     | 21,5   | 122    | 17           |
| 17              | <i>dnd/alb</i> KO | M                | Male lacking germ cells with tubular structure. | Yes  | 20/1-2015     | 20     | 77     | 12           |
| 18 <sup>3</sup> | <i>dnd/alb</i> KO | M                | Male lacking germ cells with tubular structure. | Yes  | 20/1-2015     | 17,3   | 40     | 12           |
| 19 <sup>2</sup> | <i>dnd/alb</i> KO | M                | Male lacking germ cells with tubular structure. | Yes  | 12/3-2015     | 13.5   | 31     | 14           |
| 20 <sup>3</sup> | <i>dnd/alb</i> KO | M                | Male lacking germ cells with tubular structure. | Yes  | 12/3-2015     | 22     | 110    | 14           |
| 21              | <i>dnd</i> KO     | M                | Male lacking germ cells with tubular structure. | No   | 20/1-2015     | 26     | 191    | 15           |
| 22              | <i>dnd</i> KO     | M                | Male lacking germ cells with tubular structure. | No   | 20/1-2015     | 27,5   | 231    | 15           |
| 23              | <i>dnd</i> KO     | M                | Immature male,                                  | No   | 20/1-2015     | 25,2   | 191    | 15           |
| 24              | <i>dnd</i> KO     | M                | Maturing male with half gonad- mosaic           | No   | 20/1-2015     | 27     | 254    | 12           |
| 25 <sup>4</sup> | <i>dnd</i> KO     | M                | Maturing male with mosaic gonad                 | No   | 12/8-2015     | 34     | 548    | 20           |
| 26              | <i>dnd</i> KO     | M                | Maturing male with mosaic gonad                 | No   | 12/8-2015     | 30     | 363    | 20           |
| 27 <sup>4</sup> | <i>dnd</i> KO     | M                | Maturing male with mosaic gonad                 | No   | 12/8-2015     | 37     | 724    | 20           |
| 28 <sup>3</sup> | <i>dnd</i> KO     | M                | Male lacking germ cells with tubular structure. | No   | 12/8-2015     | 41,5   | 1012   | 20           |
| 29              | <i>dnd</i> KO     | M                | Male lacking germ cells with tubular structure. | No   | 12/8-2015     | 44     | 1322   | 20           |
| 30              | <i>dnd</i> KO     | M                | Male lacking germ cells with tubular structure. | No   | 12/3-2015     | 38     | 781    | 20           |

<sup>1</sup> sdy PCR determined genetic sex

<sup>2</sup> Fish shown in Figure 1

<sup>3</sup> Fish shown in Supplementary figure S2

<sup>4</sup> Fish shown in Supplementary figure S3
